# Supplementary material for: Thiophene containing microporous and mesoporous nanoplates for separation of mercury from aqueous solution
Source: Royal Society of Chemistry journal article supplement (doi:10.1039/c8nj05527k), 2019-01-01
Supplement: c8nj05527k1.pdf [file c8nj05527k1.pdf]

## Supplementary Information

# Thiophene containing microporous and mesoporous nanoplates for separation of mercury from aqueous solution

Arindam Modak,<sup>a</sup> Sankar Das,<sup>b</sup> Dipak Kr. Chanda,<sup>c</sup> Arnab Samanta<sup>b</sup> and Subhra Jana<sup>\*a,b</sup>

<sup>a</sup>Technical Research Centre, S. N. Bose National Centre for Basic Sciences, Block - JD, Sector-III, Salt Lake, Kolkata -700 106, India.

<sup>b</sup>Department of Chemical, Biological & Macro-Molecular Sciences, S. N. Bose National Centre for Basic Sciences, Block - JD, Sector-III, Salt Lake, Kolkata -700 106, India.

<sup>c</sup>School of Materials Science and Nanotechnology, Jadavpur University, Kolkata, India.

**E-mail:** subhra.jana@bose.res.in.

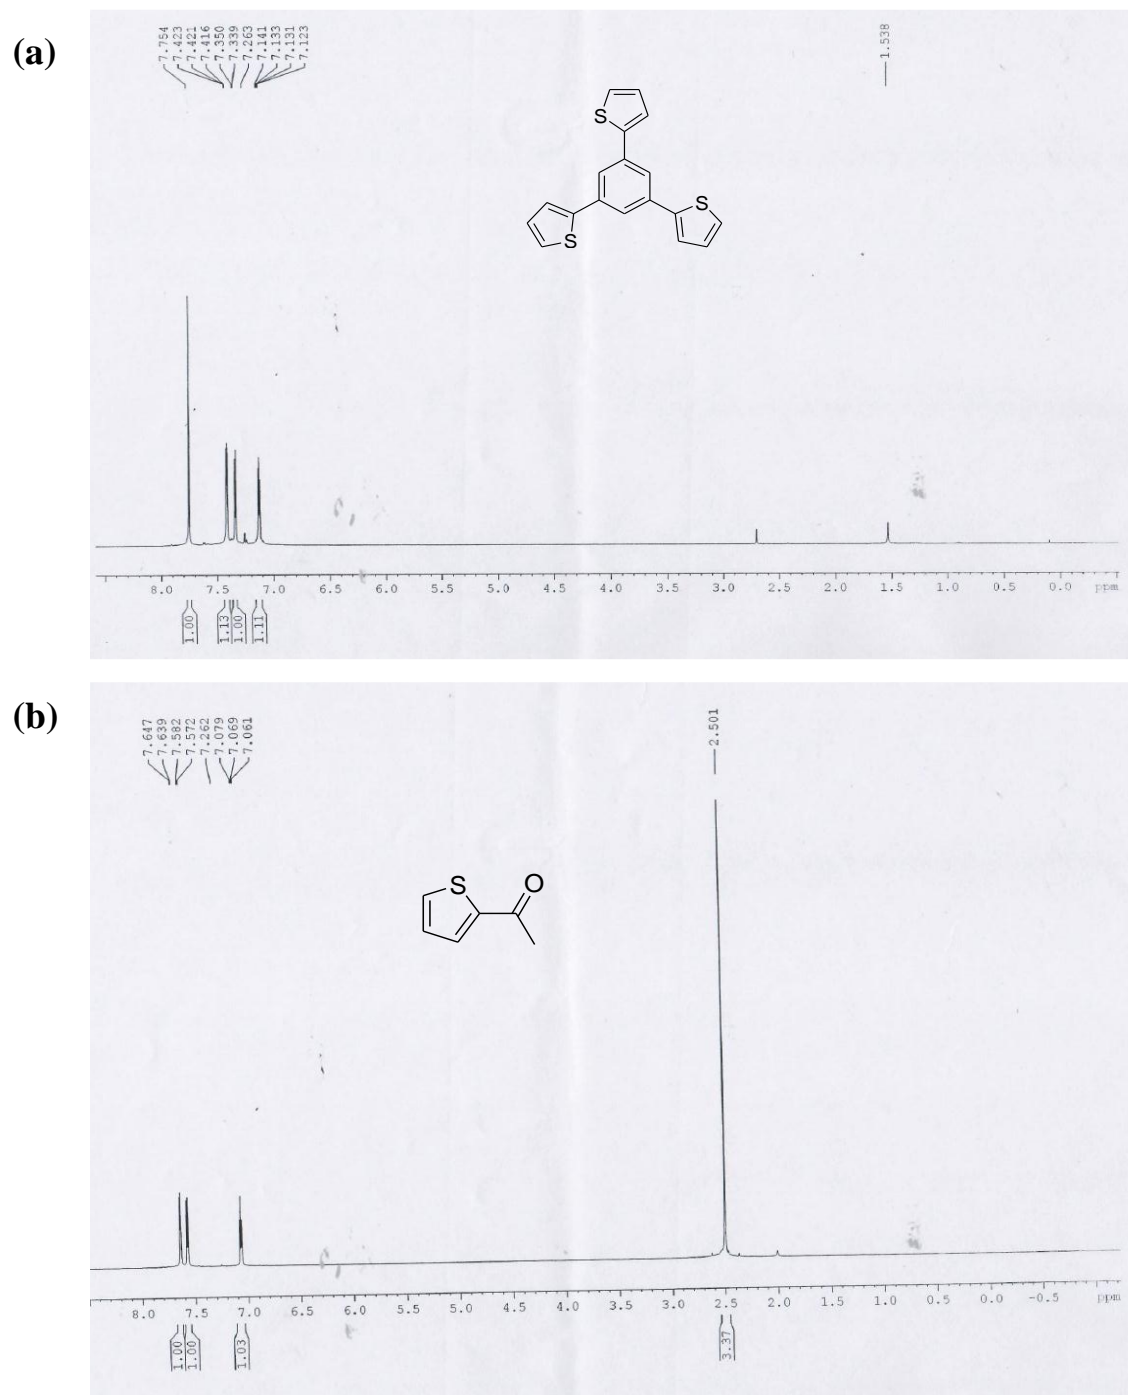

**Fig. S1**  $^1\text{H}$  NMR of (a) 1,3,5-Tris(2-thienyl)benzene and (b) 2-acetyl thiophene.

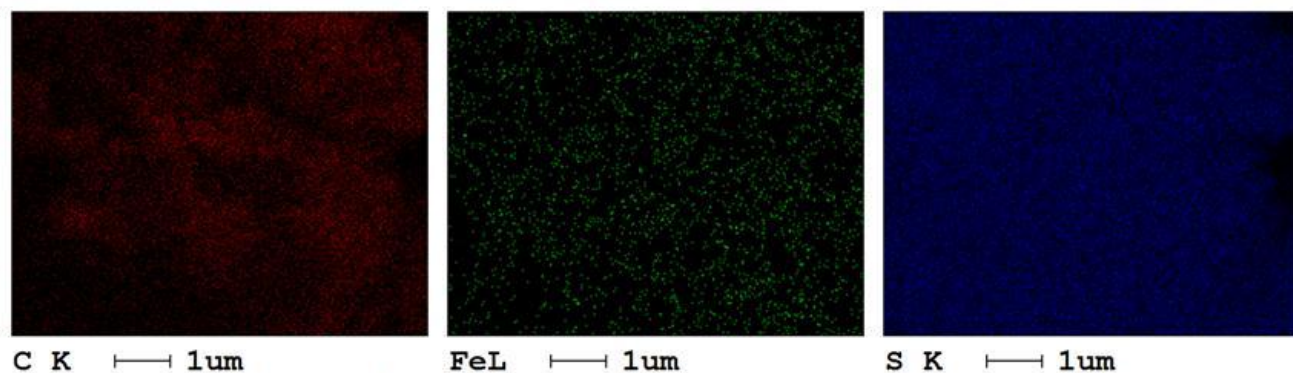

**Fig. S2** Elemental mapping of C, Fe, S in Th-2 polymer.

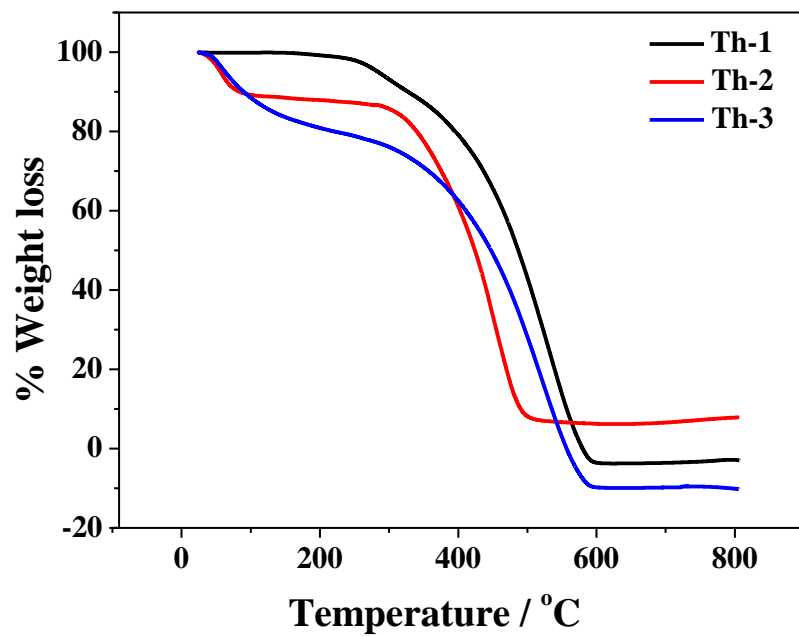

**Fig. S3** TGA spectra of Th-1, Th-2 and Th-3 polymers.

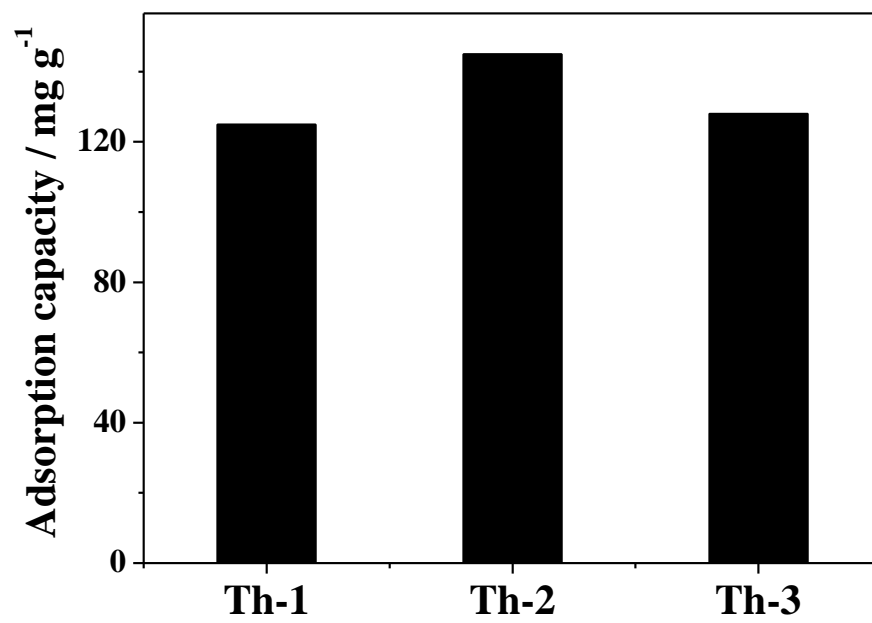

**Fig. S4** Adsorption capacity of Hg(II) using Th-1, Th-2 and Th-3 polymers.

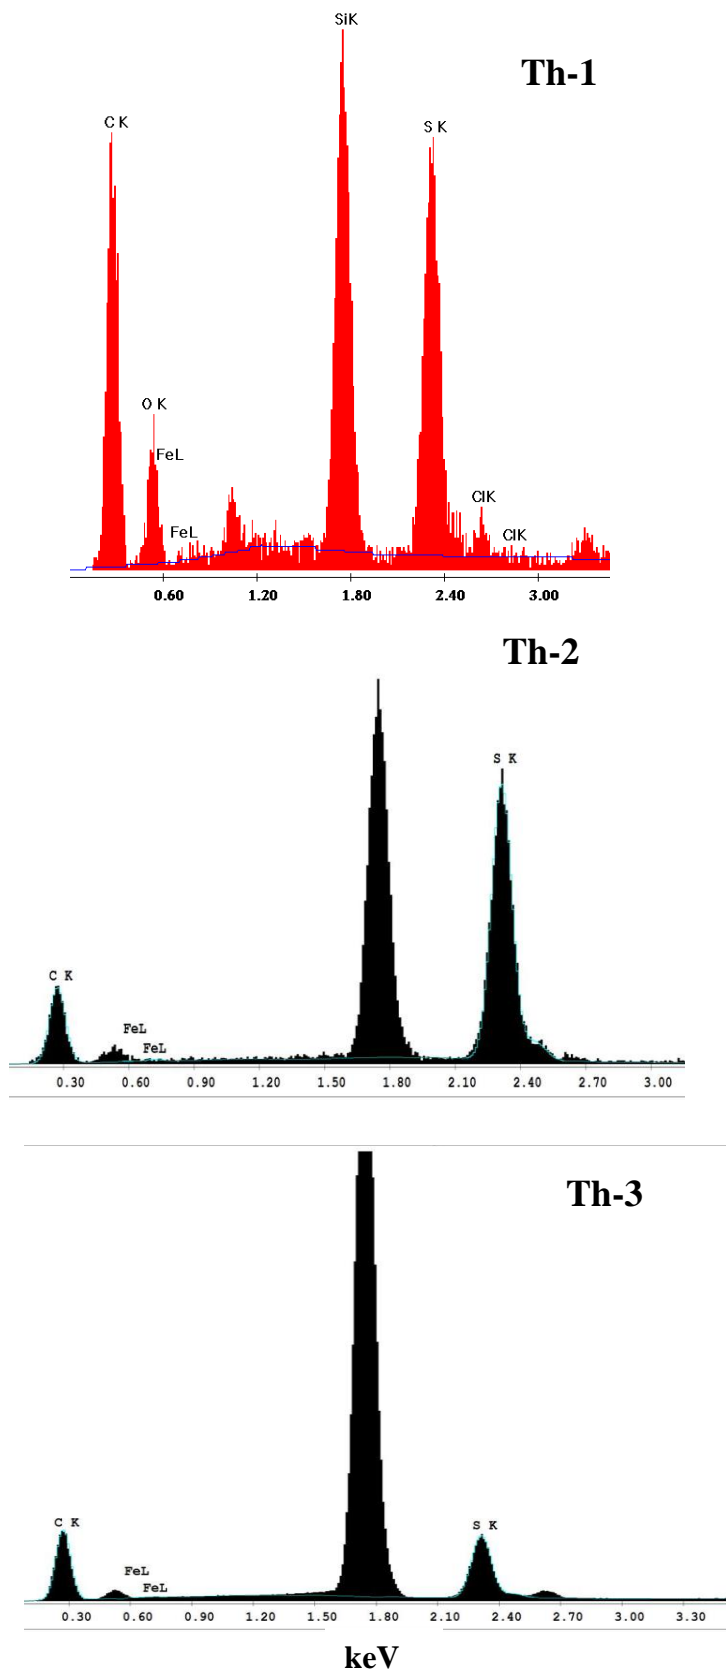

**Fig. S5** EDAX spectra of Th-1, Th-2 and Th-3, suggesting that 8, 20 and 10 wt% of sulfur is present in Th-1, Th-2 and Th-3 respectively. The strong Si peak in the spectra is because of the sampling in silicon wafer.

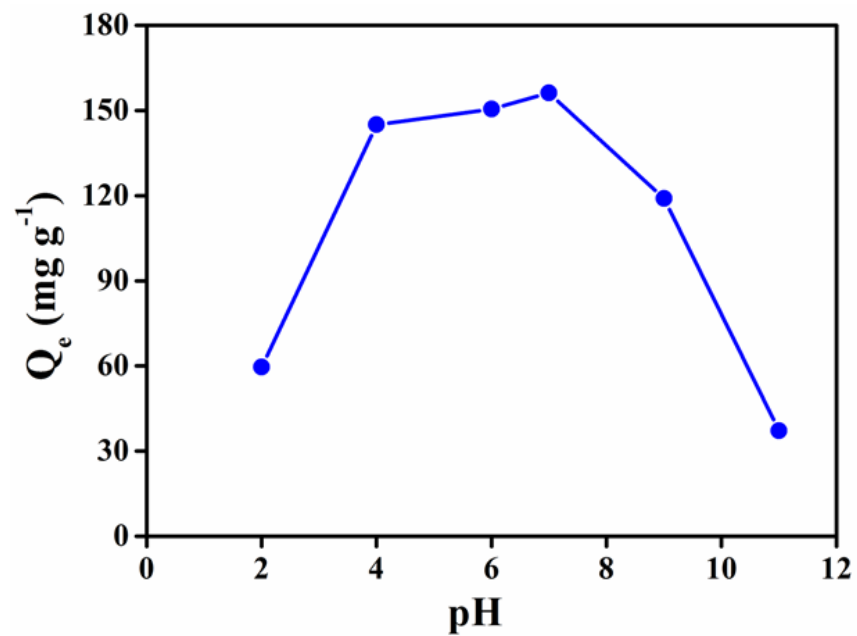

**Fig. S6** Adsorption capacity of Th-2 estimated in the range of pH 2-11, having concentration of Hg(II) solution  $200 \text{ mg L}^{-1}$ .
